# Supplementary material for: Functions of SMC2 in the Development of Zebrafish Liver
Source: MDPI journal article supplement (doi:10.3390/biomedicines9091240), 2021-09-16
Supplement: s1 [file s1]

**Table S1. The primers used in this study**

| <b>qPCR Primers</b>     | <b>Sequences (5'-3')</b>   |
|-------------------------|----------------------------|
| smc2-F                  | TAAAGTCGATTGTACTAGAGGGCTTC |
| smc2-R                  | GGAGATTTGTGGCTCGAACCT      |
| atr-F                   | ACCAGGCAGTGCAGAAACCTC      |
| atr-R                   | ATGTGCTGCACAAAGTCTAACAGC   |
| atm-F                   | TGCACGAGCTGTTAGTGTGCTG     |
| atm-R                   | AGCTGTTTGGAGCCTTTGCTTC     |
| caspase8-F              | GGAGAGAGAAAGGAGGAGAAAC     |
| caspase8-R              | CCGCTGGGTCTAGTATGTAAT      |
| bbc3-F                  | GGTTTCAAGCACTTCCCTTAGA     |
| bbc3-R                  | CCGACGCAAACACAGAAATG       |
| gadd45a1-F              | GACGGAAGCTCCTTCAGAATAC     |
| gadd45a1-R              | GTCCTCAGAAAGTCCCACAAA      |
| mdm2-F                  | AACAGCAACTCGGATGTAGG       |
| mdm2-R                  | CCACCTCAAACCTCCACACTAA     |
| tp53-F                  | GTACAAGTCCCTCCTGGAAATC     |
| tp53-R                  | GGCAAATGCGTGTAACAGTAA      |
| <b>Genotype primers</b> | <b>Sequences (5'-3')</b>   |
| smc2-gF                 | TGGTTGAACTGAAAGCAACG       |
| smc2-gR                 | CTTCCAGTTGTTTGCATCTCG      |
| tp53-gF                 | TGCCAGAGTATGTGTCTGTC       |
| tp53-gR                 | TGAGAGCAGCATCATGAAGC       |
| <b>WISH primers</b>     | <b>Sequences (5'-3')</b>   |
| smc2-pF                 | AAGGTGAACTGAGGCGAAG        |
| smc2-pR                 | TGAGCATCGTTGTTTTGCTC       |
| fapb10-pF               | AGCTTCTCCAGAAAGCATGG       |
| fapb10-pR               | AGTGATGGTGAAACGCTTCAG      |
| fabp2-pF                | TCATCATCATGACCTTCAACG      |
| fabp2-pR                | TCACAGGTGCAAATGACACG       |
| trypsin-pF              | ACACCACTCAACAGCTTCACC      |
| trypsin-pR              | AGATGGTATTGCAACACGCC       |
| insulin-pF              | CCATATCCACCATTCTCGC        |
| insulin-pR              | CAAACGGAGAGCATTAAGGC       |
| cp-pF                   | AAACCCTCCCAAAGCACTGAC      |
| cp-pR                   | TACCACTCCCGAATATGCC        |
| foxa1-pF                | TGGATTTCTCCATAATGTTGGG     |
| foxa1-pR                | AAGGGTCCATGCTGGCTCTC       |
| foxa3-pF                | TGAGGCAAATGAGATGTATTCCTC   |
| foxa3-pR                | TAGCTGTTGTAGGCCATCACCT     |
| gata4-pF                | GATATGTATCAAGGTGTAACGATGG  |
| gata4-pR                | TGGTGTGTGTAGAGCGGTGT       |
| hhex-pF                 | TCCATCATGCAATTCCAGCAC      |
| hhex-pR                 | CATAGGGTGAACTGATGCTCGT     |
| prox1-pF                | GAGGCAGTGAGCCTAATTTC       |
| prox1-pR                | CAGAGAGGGATGGTGGTGGT       |

**Table S2. Comparison of condensin I and condensin II subunits of human, mouse and zebrafish**

|                                | Human Genes   | Human Proteins<br>(AA NO.) | Mouse orthologs<br>(AA NO. / Identities) | Zebrafish orthologs<br>(AA NO. / Identities) |
|--------------------------------|---------------|----------------------------|------------------------------------------|----------------------------------------------|
| Condensin I-Specific subunits  | NCAPD2/CAP-D2 | NCAPD2(1401)               | 1392/85.9                                | 1380/48.5                                    |
|                                | NCAPG/CAPG    | NCAPG(1015)                | 1004/82                                  | 1003/50.2                                    |
|                                | NCAPH/CAP-H   | NCAPH(741)                 | 731/77.5                                 | 690/46                                       |
| Shared subunits                | SMC2/CAP-E    | SMC2(1197)                 | 1191/91.6                                | 1199/74.2                                    |
|                                | SMC4/CAP-C    | SMC4(1288)                 | 1286/89.5                                | 1289/68.2                                    |
| Condensin II-specific subunits | NCAPD3/CAP-D3 | NCAPD3(1498)               | 1506/72.7                                | 1419/43                                      |
|                                | NCAPG2/CAP-G2 | NCAPG2(1143)               | 1138/81                                  | 1140/45.1                                    |
|                                | NCAPH2/CAPH2  | NCAPH2(606)                | 607/78.4                                 | 592/36.5                                     |

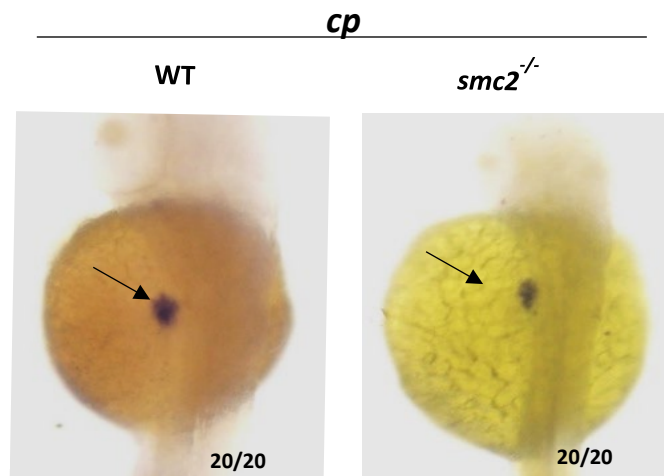

**Figure S1. WISH of specific maker (*cp*) for hepatic cells.**

WT and *smc2*<sup>-/-</sup> mutant embryos were stained with RNA probes of *cp*, a marker of hepatocytes at 48 hpf.
